# Supplementary material
Source: PubMed Central journal article supplement (PMC6137572)
Supplement: blood831065-suppl1.pdf [file blood831065-suppl1.pdf]

**Supplemental Materials and Methods  
Supplemental Tables  
& Supplemental Figures**

**Aged Murine Hematopoietic Stem Cells Drive Aging-Associated  
Immune Remodeling**

Hanna Leins, Medhanie Mulaw, Karina Eiwien, Vadim Sakk, Ying Liang, Michael Denking,  
Hartmut Geiger and Reinhold Schirmbeck

## Supplemental Materials and Methods

### Mice

B6.129S7-*Rag1*<sup>tm1Mom</sup>/J (*RAG1*<sup>-/-</sup>), B6.SJL-*Ptprc*<sup>a</sup>*Pepc*<sup>b</sup>/BoyJ (B6.SJL) and C57BL/6J mice were obtained from the animal facility of Ulm University (Ulm, Germany) or from Charles River Laboratories (Wilmington, USA). Studies were carried out in strict accordance with the recommendations in the Guide for the Care and Use of Laboratory Animals of the German Federal Animal Protection Law. The protocols were approved by the Committee on the Ethics of Animal Experiments of the University of Ulm (Tierforschungszentrum Ulm, Oberberghof) and the Regierungspräsidium Tübingen.

### Cell Sorting

HSCs were isolated from bone marrow of femur and tibia of young and aged healthy C57BL/6 and B6.SJL mice. Mononuclear cells were separated from total bone marrow by low-density centrifugation (Histopaque 1083, Sigma) and stained with a cocktail of biotinylated rat anti-mouse lineage antibodies: anti-CD11b, anti-B220, anti-CD5, anti-Gr-1, anti-Ter119 and anti-CD8a. Subsequently, lineage depletion was performed by magnetic separation (Dynabeads, Invitrogen) to enrich for lineage negative cells. Thereafter, cells were stained with anti-Sca-1, anti-c-Kit, anti-CD34, anti-Flk2, and Streptavidin (all from e-bioscience). LT-HSCs were then sorted as  $\text{lin}^- \text{Sca-1}^+ \text{c-kit}^+ \text{CD34}^- \text{Flk-2}^-$  cells using a BD FACS Aria II or a BD FACS Aria III (BD Bioscience).

### Non-competitive HSC transplantation

HSCs were sorted in 1.5 mL reaction tubes and cultured for 16 hrs in HBSS (Lonza) supplemented with 10% FBS (Biochrome) and, where indicated, with 5 $\mu$ M CASIN<sup>1</sup> (Xcessbio) at 37°C (5% CO<sub>2</sub>,

3% O<sub>2</sub>). Subsequently, HSCs were transplanted into sublethally irradiated *RAG1*<sup>-/-</sup> mice. Reconstituted mice were maintained on Neomycin solution (1.1 mg/mL, Sigma-Aldrich) in drinking water. Donor contribution in peripheral blood was analyzed by FACS from 4 to 12 weeks post transplantation.

### **Flow Cytometry**

For characterization of the immune system, peripheral blood and spleen immunostaining was performed according to standard protocols. Briefly, erythrocytes from single-cell spleen suspensions and peripheral blood were lysed with a hypotonic buffer. Cell surface was stained for 30 min at 4°C with fluorochrome-conjugated antibodies, cells stained with biotin-conjugated antibodies were stained again for 30 min at 4°C with fluorochrom-tagged streptavidin. Intracellular staining for FoxP3, HELIOS and Ki-67 was performed using the Foxp3 / Transcription Factor Staining Buffer Set (ebioscience) according to the manufacturer's protocol. Samples were collected with LSR-II (BD Bioscience). Flow Cytometer and data was analyzed using FCS express software. All antibodies used are summarized in supplemental Table S1.

### **RNA Sequencing**

12 weeks after transplantation, 50.000 naïve CD4<sup>+</sup> T cells and CD19<sup>+</sup> B cells were sorted in Ultra Culture medium (Lonza). RNA was extracted from sorted cells using the RNeasy Micro Kit (Qiagen). cDNA was processed with the SMART-Seq v4 Ultra Low Input RNA Kit for Sequencing (Clontech). Quality and quantity of the cDNA was determined using the 2100 Bioanalyzer (Agilent). cDNA library was prepared using the Nextera XT DNA Library Prep Kit (Illumina). At the end all cDNA libraries contained a unique index barcode and were pooled to one sample. Samples were sequenced on Illumina HiSeq2000 platform. Per sample sequencing depth was 30 million reads.

The raw paired-end reads were adapter trimmed and quality filtered (phred score of > 20) using the cutadapt wrapper trim galore<sup>2</sup>. Filtered sequences were aligned to the mouse genome version mm10 using TopHat and processed further using Cufflinks<sup>3</sup>. All downstream analysis including differential expression analysis and additional statistical tests related to RNA-seq were performed using R and bioconductor packages<sup>4,5</sup> and in-house scripts. The broad MIT GSEA application<sup>6</sup> was used for Gene Set Enrichment Analysis (GSEA).

### **Statistical Analyses**

Data were assumed to meet normal distribution. All data are plotted as mean  $\pm$  1 (s.e.m.). The s.e.m. is used to indicate the precision of an estimated mean. Such a data representation does not affect the statistical analyses as variance information is used in the test statistics. Data were analyzed using PRISM software (GraphPad). A paired Student's *t*-test was used to determine the significance of the different means among two groups. To compare means of three independent groups, one-way ANOVA. When the overall *P*-value was < 0.05, Bonferroni post-test was applied to compare all pairs of data set. The total number (*n*) of mice, analyzed within a set of experiments, included in the final statistical analyses is indicated. Mice for experiments were randomly chosen from in-house colonies or suppliers. Animals showing signs of sickness, with clear alterations of blood parameter and/or showing signs of major disease involving also non-haematopoietic tissues were excluded from analysis.

**References:**

1. Florian MC, Dörr K, Niebel A, et al. Cdc42 Activity Regulates Hematopoietic Stem Cell Aging and Rejuvenation. *Cell Stem Cell*. 2012;10(5):520-530.
2. Martin M. Cutadapt removes adapter sequences from high-throughput sequencing reads. *EMBnetjournal*. 2011;17.
3. Trapnell C, Williams BA, Pertea G, et al. Transcript assembly and quantification by RNA-Seq reveals unannotated transcripts and isoform switching during cell differentiation. *Nat Biotechnol*. 2010;28(5):511-515.
4. R Core Team. R: A language and environment for statistical computing: R Foundation for Statistical Computing, Vienna, Austria, URL <http://www.R-project.org/>; 2015.
5. Huber W, Carey VJ, Gentleman R, et al. Orchestrating high-throughput genomic analysis with Bioconductor. *Nat Methods*. 2015;12:115-121.
6. Subramanian A, Tamayo P, Mootha VK, et al. Gene set enrichment analysis: A knowledge-based approach for interpreting genome-wide expression profiles. *Proc Natl Acad Sci USA*. 2005;102:15545–15550.

## Supplemental Tables

**Supplemental Table S1. Antibodies used for flow cytometry analyses.**

| Antibody                  | Manufacturer    | Clone     | Catalog No. | Lot No.     |
|---------------------------|-----------------|-----------|-------------|-------------|
| anti-CD3 PE-Cy7           | ebioscience     | 145-2C11  | 25-0031-82  | 4304567     |
| anti-CD3 FITC             | ebioscience     | 145-2C11  | 11-0031-85  | E00061-165  |
| anti-CD4 APC              | ebioscience     | RM4-5     | 17-0042-83  | E0741-1632  |
| anti-CD4 biotinylated     | ebioscience     | RM4-5     | 13-0042-85  | E02363-1630 |
| anti-CD8 Pacific Blue     | BD              | 53-6.7    | 558106      | 7144718     |
| anti-CD8 PE-Cy7           | ebioscience     | 53-6.7    | 25-0081-82  | 4290706     |
| anti-CD44 FITC            | BD              | IM7       | 553133      | 96243       |
| anti-CD62L biotinylated   | ebioscience     | MEL-14    | 13-0621-85  | E02581-1631 |
| anti-Gr-1 eFluor 450      | ebioscience     | RB6-8C5   | 48-5931-82  | 4274410     |
| anti-CD11b AlexaFluor700  | ebioscience     | M1/70     | 56-0112-82  | 4319576     |
| anti-CD19 APC             | ebioscience     | eBio1D3   | 17-0193-82  | 4280786     |
| anti-CD244.2 FITC         | ebioscience     | eBio244F4 | 11-2441-82  | E00538-1633 |
| anti-LAG-3 APC            | ebioscience     | eBioC9B7W | 17-2231-82  | E16755-105  |
| anti-TIM-3 AlexaFluor488  | R&D Systems     | # 215008  | FAB1529G    | ADJN0315061 |
| anti-PD-1 biotinylated    | ebioscience     | J43       | 12-9985-83  | E02310-187  |
| anti-FoxP3 FITC           | ebioscience     | FJK-16s   | 11-5773-82  | E00644-1634 |
| anti-HELIOS Pacific Blue  | BioLegend       | 22F6      | 137210      | B227508     |
| anti-Ki-67 APC            | BioLegend       | 16A8      | 652406      | B223137     |
| anti-CD23 PE-Cy7          | ebioscience     | B3B4      | 25-0232-82  | E07532-1634 |
| anti-CD21/35 Pacific Blue | BioLegend       | 7E9       | 123414      | B178057     |
| anti-CD45.1 PE            | BD              | A20       | 553776      | 3303840     |
| anti-CD45.1 APC           | BioLegend       | A20       | 110714      | B136085     |
| anti-CD45.2 APC-Vio770    | Miltenyi Biotec | 104-2     | 130-105-113 | 5150915279  |
| Streptavidin PerCP-Cy5.5  | eBioscience     | -         | 45-4317-82  | 4295929     |

**Supplemental Table S2. Overlapping genes differentially expressed in naïve CD4<sup>+</sup> T cells  
between recipients of DY versus DO and DO+C versus DO HSCs**

| Gene      | Sample 1 | Sample 2 | log2 fold change | P       | Q          | Sample 1 | Sample 3   | log2 fold change | P       | Q          |
|-----------|----------|----------|------------------|---------|------------|----------|------------|------------------|---------|------------|
| Adam19    | Aged     | Young    | -2.99584         | 0.00005 | 0.00637929 | Aged     | Aged_CASIN | -1.33793         | 0.00005 | 0.00637929 |
| Ank       | Aged     | Young    | 1.10882          | 0.00005 | 0.00637929 | Aged     | Aged_CASIN | 1.01384          | 0.00025 | 0.0232578  |
| Capg      | Aged     | Young    | -1.8171          | 0.00005 | 0.00637929 | Aged     | Aged_CASIN | -1.0898          | 0.00005 | 0.00637929 |
| Cd74      | Aged     | Young    | -1.94069         | 0.00005 | 0.00637929 | Aged     | Aged_CASIN | -1.42174         | 0.00005 | 0.00637929 |
| Coro2a    | Aged     | Young    | -2.18448         | 0.00005 | 0.00637929 | Aged     | Aged_CASIN | -1.59865         | 0.00005 | 0.00637929 |
| Cox6b1    | Aged     | Young    | -1.36289         | 0.0005  | 0.0366025  | Aged     | Aged_CASIN | -1.31391         | 0.0004  | 0.0332316  |
| E2f2      | Aged     | Young    | -1.58993         | 0.00005 | 0.00637929 | Aged     | Aged_CASIN | -1.43616         | 0.00005 | 0.00637929 |
| Folr4     | Aged     | Young    | -1.29553         | 0.00005 | 0.00637929 | Aged     | Aged_CASIN | -1.01586         | 0.0002  | 0.0201831  |
| Hivep3    | Aged     | Young    | -1.16221         | 0.00005 | 0.00637929 | Aged     | Aged_CASIN | -0.989197        | 0.0002  | 0.0201831  |
| Ikzf2     | Aged     | Young    | -1.24203         | 0.00005 | 0.00637929 | Aged     | Aged_CASIN | -1.16622         | 0.00005 | 0.00637929 |
| Il2rb     | Aged     | Young    | -1.54187         | 0.00005 | 0.00637929 | Aged     | Aged_CASIN | -1.10026         | 0.00005 | 0.00637929 |
| Itgae     | Aged     | Young    | -2.69962         | 0.00025 | 0.0232578  | Aged     | Aged_CASIN | -2.02625         | 0.00005 | 0.00637929 |
| Itih5     | Aged     | Young    | -1.02489         | 0.00015 | 0.0160437  | Aged     | Aged_CASIN | -1.32318         | 0.00005 | 0.00637929 |
| Lag3      | Aged     | Young    | -2.87494         | 0.00005 | 0.00637929 | Aged     | Aged_CASIN | -1.22154         | 0.0001  | 0.0115987  |
| Maf       | Aged     | Young    | -2.84395         | 0.00005 | 0.00637929 | Aged     | Aged_CASIN | -1.61631         | 0.00005 | 0.00637929 |
| Mki67     | Aged     | Young    | -2.74954         | 0.00005 | 0.00637929 | Aged     | Aged_CASIN | -1.80689         | 0.00005 | 0.00637929 |
| Neb       | Aged     | Young    | -2.64949         | 0.00005 | 0.00637929 | Aged     | Aged_CASIN | -1.53759         | 0.00005 | 0.00637929 |
| Penk      | Aged     | Young    | -1.4644          | 0.00005 | 0.00637929 | Aged     | Aged_CASIN | -1.59808         | 0.00005 | 0.00637929 |
| Pglyrp1   | Aged     | Young    | -2.80696         | 0.00015 | 0.0160437  | Aged     | Aged_CASIN | -1.52549         | 0.00025 | 0.0232578  |
| Ptprs     | Aged     | Young    | -0.855839        | 0.0007  | 0.0463089  | Aged     | Aged_CASIN | -1.18423         | 0.00005 | 0.00637929 |
| Rgmb      | Aged     | Young    | 1.10331          | 0.0002  | 0.0201831  | Aged     | Aged_CASIN | 1.10052          | 0.0002  | 0.0201831  |
| Rpl14-ps1 | Aged     | Young    | -0.984562        | 0.00005 | 0.00637929 | Aged     | Aged_CASIN | -1.05092         | 0.00005 | 0.00637929 |
| Rplp2-ps1 | Aged     | Young    | -0.848291        | 0.00005 | 0.00637929 | Aged     | Aged_CASIN | -0.78198         | 0.00025 | 0.0232578  |
| Rps9      | Aged     | Young    | -0.75268         | 0.00045 | 0.0346461  | Aged     | Aged_CASIN | -0.734776        | 0.0006  | 0.0417012  |
| St8sia6   | Aged     | Young    | 1.05961          | 0.00005 | 0.00637929 | Aged     | Aged_CASIN | 1.00605          | 0.00005 | 0.00637929 |
| Tdrp      | Aged     | Young    | 1.37976          | 0.00005 | 0.00637929 | Aged     | Aged_CASIN | 1.22379          | 0.00005 | 0.00637929 |
| Tmsb4x    | Aged     | Young    | -0.727061        | 0.00025 | 0.0232578  | Aged     | Aged_CASIN | -0.919012        | 0.00005 | 0.00637929 |
| Tnfrsf1b  | Aged     | Young    | -1.95258         | 0.00005 | 0.00637929 | Aged     | Aged_CASIN | -1.06302         | 0.00005 | 0.00637929 |
| Tnfrsf4   | Aged     | Young    | -1.67133         | 0.00005 | 0.00637929 | Aged     | Aged_CASIN | -0.962786        | 0.0005  | 0.0366025  |
| Tnfrsf9   | Aged     | Young    | -1.86297         | 0.00005 | 0.00637929 | Aged     | Aged_CASIN | -1.00427         | 0.00065 | 0.0439784  |

**Supplemental Table S3. Overlapping genes differentially expressed in CD19<sup>+</sup> B cells between recipients of DY versus DO and DO+C versus DO HSCs**

| Gene      | Sample 1 | Sample 2 | log2 fold change | P       | Q          | Sample 1 | Sample 3   | log2 fold change | P       | Q          |
|-----------|----------|----------|------------------|---------|------------|----------|------------|------------------|---------|------------|
| Abl1      | Aged     | Young    | 0.880356         | 0.0001  | 0.0141471  | Aged     | Aged_CASIN | 0.969329         | 0.00005 | 0.00838953 |
| Ada       | Aged     | Young    | -1.06182         | 0.0001  | 0.0141471  | Aged     | Aged_CASIN | -0.986074        | 0.00035 | 0.0319652  |
| Aicda     | Aged     | Young    | -2.0379          | 0.00005 | 0.00838953 | Aged     | Aged_CASIN | -1.47907         | 0.00005 | 0.00838953 |
| Alyref    | Aged     | Young    | -1.04245         | 0.00005 | 0.00838953 | Aged     | Aged_CASIN | -0.645571        | 0.0001  | 0.0141471  |
| Basp1     | Aged     | Young    | -1.89218         | 0.00005 | 0.00838953 | Aged     | Aged_CASIN | -1.39058         | 0.00005 | 0.00838953 |
| Ccl5      | Aged     | Young    | -1.5029          | 0.0007  | 0.0477965  | Aged     | Aged_CASIN | -1.90476         | 0.00005 | 0.00838953 |
| Ccna2     | Aged     | Young    | -1.33337         | 0.00005 | 0.00838953 | Aged     | Aged_CASIN | -1.02471         | 0.00015 | 0.0187673  |
| Ccr7      | Aged     | Young    | 0.795555         | 0.00005 | 0.00838953 | Aged     | Aged_CASIN | 0.657927         | 0.0004  | 0.0343571  |
| Cenpe     | Aged     | Young    | -1.47534         | 0.00005 | 0.00838953 | Aged     | Aged_CASIN | -1.25628         | 0.00005 | 0.00838953 |
| Cenpv     | Aged     | Young    | -1.70656         | 0.00005 | 0.00838953 | Aged     | Aged_CASIN | -1.56451         | 0.00005 | 0.00838953 |
| Cmtm6     | Aged     | Young    | 0.785986         | 0.0005  | 0.039212   | Aged     | Aged_CASIN | 0.799921         | 0.0003  | 0.0289888  |
| Cnr2      | Aged     | Young    | 0.828734         | 0.00005 | 0.00838953 | Aged     | Aged_CASIN | 0.722125         | 0.0001  | 0.0141471  |
| E2f8      | Aged     | Young    | -1.31291         | 0.00005 | 0.00838953 | Aged     | Aged_CASIN | -1.12067         | 0.0005  | 0.039212   |
| Fam43a    | Aged     | Young    | 0.938744         | 0.00005 | 0.00838953 | Aged     | Aged_CASIN | 0.866558         | 0.00005 | 0.00838953 |
| Fosb      | Aged     | Young    | 0.778872         | 0.00005 | 0.00838953 | Aged     | Aged_CASIN | 0.780242         | 0.00005 | 0.00838953 |
| Gstt1     | Aged     | Young    | -2.61658         | 0.0005  | 0.039212   | Aged     | Aged_CASIN | -1.8917          | 0.00025 | 0.0263963  |
| H1fx      | Aged     | Young    | -2.14388         | 0.00005 | 0.00838953 | Aged     | Aged_CASIN | -1.3541          | 0.00005 | 0.00838953 |
| H2afx     | Aged     | Young    | -1.48817         | 0.00005 | 0.00838953 | Aged     | Aged_CASIN | -1.09089         | 0.00005 | 0.00838953 |
| Irf9      | Aged     | Young    | 0.888437         | 0.00005 | 0.00838953 | Aged     | Aged_CASIN | 0.899991         | 0.00005 | 0.00838953 |
| Irs2      | Aged     | Young    | 0.738187         | 0.00015 | 0.0187673  | Aged     | Aged_CASIN | 0.831347         | 0.00005 | 0.00838953 |
| Kif11     | Aged     | Young    | -1.51087         | 0.00005 | 0.00838953 | Aged     | Aged_CASIN | -1.03966         | 0.00005 | 0.00838953 |
| Klf4      | Aged     | Young    | 0.931962         | 0.00005 | 0.00838953 | Aged     | Aged_CASIN | 0.969215         | 0.00005 | 0.00838953 |
| Lmnb1     | Aged     | Young    | -1.11865         | 0.00005 | 0.00838953 | Aged     | Aged_CASIN | -0.779146        | 0.00005 | 0.00838953 |
| Lmo7      | Aged     | Young    | -1.29653         | 0.00005 | 0.00838953 | Aged     | Aged_CASIN | -1.17151         | 0.0002  | 0.0231497  |
| Mef2b     | Aged     | Young    | -1.44234         | 0.00005 | 0.00838953 | Aged     | Aged_CASIN | -0.91891         | 0.0003  | 0.0289888  |
| Mki67     | Aged     | Young    | -1.43013         | 0.00005 | 0.00838953 | Aged     | Aged_CASIN | -1.00217         | 0.00005 | 0.00838953 |
| Mybl1     | Aged     | Young    | -1.88036         | 0.00005 | 0.00838953 | Aged     | Aged_CASIN | -1.19673         | 0.00005 | 0.00838953 |
| Nr4a1     | Aged     | Young    | 0.891675         | 0.00005 | 0.00838953 | Aged     | Aged_CASIN | 0.795549         | 0.00005 | 0.00838953 |
| Pgp       | Aged     | Young    | -0.851248        | 0.0002  | 0.0231497  | Aged     | Aged_CASIN | -0.658618        | 0.00015 | 0.0187673  |
| Psat1     | Aged     | Young    | -1.12094         | 0.00005 | 0.00838953 | Aged     | Aged_CASIN | -0.80648         | 0.00035 | 0.0319652  |
| Psip1     | Aged     | Young    | -0.828715        | 0.00005 | 0.00838953 | Aged     | Aged_CASIN | -0.718468        | 0.0004  | 0.0343571  |
| Racgap1   | Aged     | Young    | -1.42393         | 0.00005 | 0.00838953 | Aged     | Aged_CASIN | -1.07095         | 0.00045 | 0.0374625  |
| Rasgef1b  | Aged     | Young    | 0.832481         | 0.0001  | 0.0141471  | Aged     | Aged_CASIN | 0.671335         | 0.0004  | 0.0343571  |
| Rassf6    | Aged     | Young    | -1.52456         | 0.00025 | 0.0263963  | Aged     | Aged_CASIN | -1.98709         | 0.00015 | 0.0187673  |
| Rgs13     | Aged     | Young    | -2.53019         | 0.00055 | 0.0413359  | Aged     | Aged_CASIN | -1.63399         | 0.00045 | 0.0374625  |
| Rplp2-ps1 | Aged     | Young    | 0.750418         | 0.00005 | 0.00838953 | Aged     | Aged_CASIN | 0.786135         | 0.00005 | 0.00838953 |
| Rrm2      | Aged     | Young    | -1.4238          | 0.00005 | 0.00838953 | Aged     | Aged_CASIN | -1.03132         | 0.0001  | 0.0141471  |
| S100a8    | Aged     | Young    | -4.73387         | 0.00005 | 0.00838953 | Aged     | Aged_CASIN | -2.07499         | 0.00005 | 0.00838953 |



|        |      |       |           |         |            |  |      |            |           |         |            |
|--------|------|-------|-----------|---------|------------|--|------|------------|-----------|---------|------------|
| Scimp  | Aged | Young | -2.41945  | 0.00005 | 0.00838953 |  | Aged | Aged_CASIN | -1.38356  | 0.00005 | 0.00838953 |
| Sh2b2  | Aged | Young | -1.34978  | 0.00005 | 0.00838953 |  | Aged | Aged_CASIN | -0.787783 | 0.0005  | 0.039212   |
| Sik1   | Aged | Young | 0.84603   | 0.00005 | 0.00838953 |  | Aged | Aged_CASIN | 0.729784  | 0.00015 | 0.0187673  |
| Ssbp3  | Aged | Young | -1.31069  | 0.00005 | 0.00838953 |  | Aged | Aged_CASIN | -0.690089 | 0.0005  | 0.039212   |
| Tbx21  | Aged | Young | -1.61984  | 0.00005 | 0.00838953 |  | Aged | Aged_CASIN | -0.71298  | 0.00065 | 0.0459779  |
| Top2a  | Aged | Young | -0.965513 | 0.00005 | 0.00838953 |  | Aged | Aged_CASIN | -0.697743 | 0.0006  | 0.043875   |
| Zbtb10 | Aged | Young | 0.679227  | 0.0007  | 0.0477965  |  | Aged | Aged_CASIN | 0.700107  | 0.0004  | 0.0343571  |
| Zbtb38 | Aged | Young | -0.92191  | 0.00005 | 0.00838953 |  | Aged | Aged_CASIN | -0.878069 | 0.00055 | 0.0413359  |

Figure S1

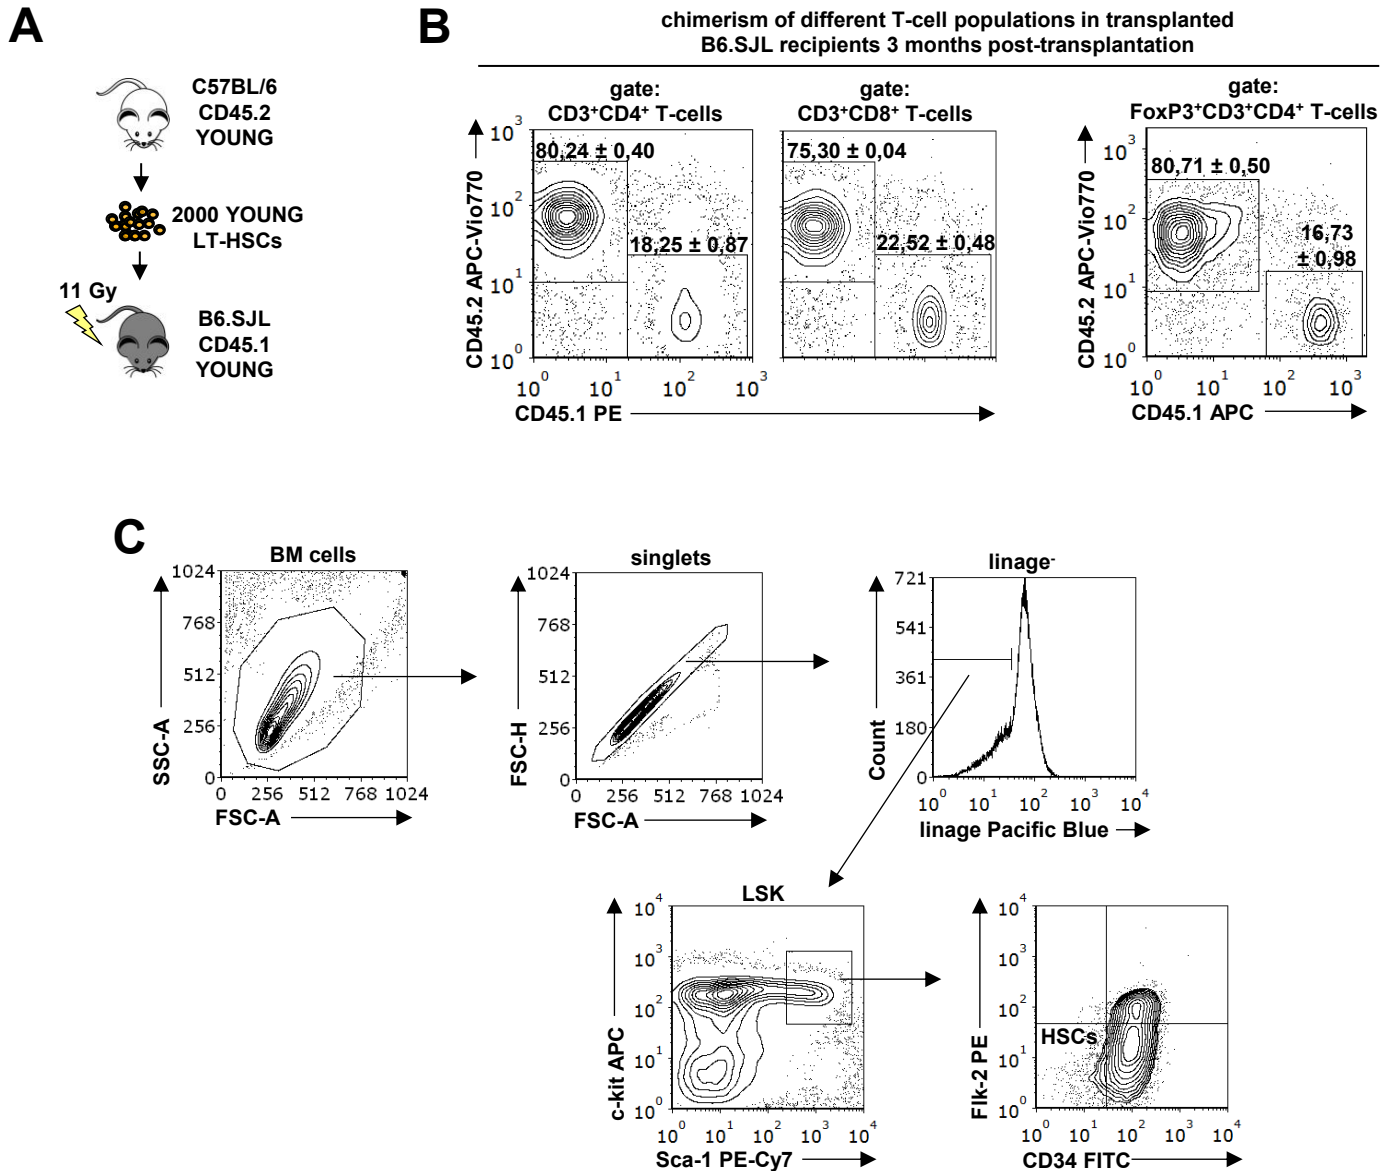

**Figure S1. Limitations of previous transplantation schemes in immune competent recipients.** (A) HSC transplantation in lethally irradiated B6.SJL mice. Schematic representation of the experimental setup: 2000 HSCs were isolated from young C57BL/6 (CD45.2) mice and were subsequently transplanted into lethally irradiated young B6.SJL (CD45.1) recipients. (B) 3 months after transplantation, chimerism of different splenic T-cell populations was determined in recipient mice ( $n = 2$ ). Representative graphs of individual stains and quantification ( $\pm$  SD) of donor- and recipient-derived cells are shown. (C) Representative flow cytometry gating to isolate HSCs. Panels were gated as shown after exclusion of dead cells and doublets. LT-HSCs were sorted out as lin<sup>-</sup> c-kit<sup>+</sup>Sca-1<sup>+</sup> Flk-2<sup>-</sup>CD34<sup>-</sup> cells using a BD FACS Aria II or a BD FACS Aria III (BD Bioscience). (B) mean  $\pm$ SD

## Figure S2

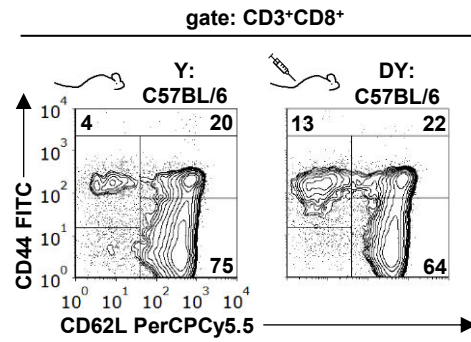

**Figure S2. Generation of a youthful naïve CD8<sup>+</sup> T-cell pattern is independent of the congenic CD45.1 interval in CD45.1<sup>+</sup> B6.SJL animals.** Representative flow cytometry plots from splenic CD3<sup>+</sup>CD8<sup>+</sup> T-cells isolated from non-transplanted young C57BL/6 mice and RAG1<sup>-/-</sup> recipients transplanted with young HSCs isolated from C57BL/6 donors. Depicted are surface expression profiles of CD44 and CD62L within the CD3<sup>+</sup>CD8<sup>+</sup> T-cell population. Data is representative of two experiments with  $n = 3$  animals each.

**Figure S3**

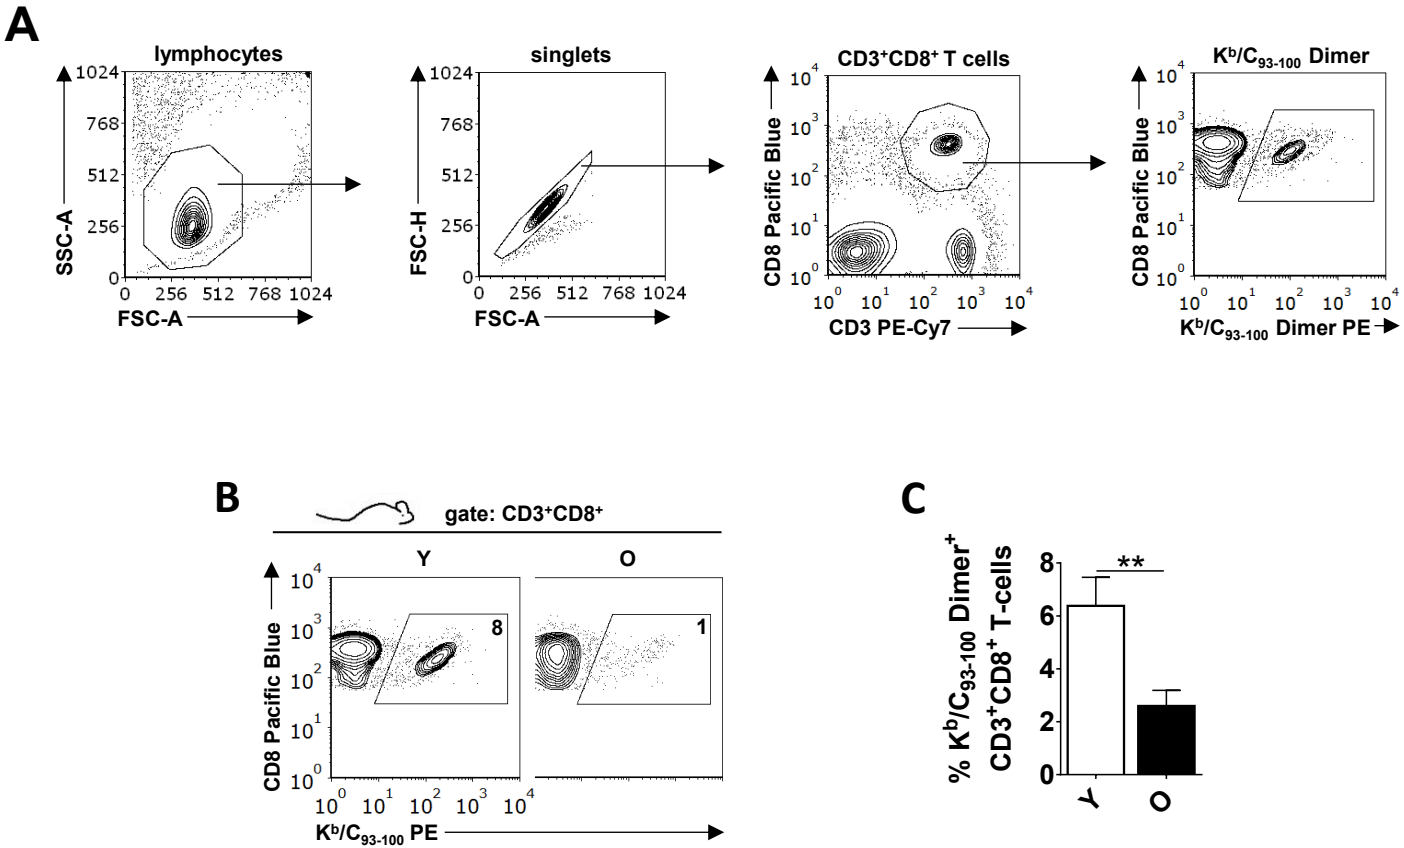

**Figure S3. Functional changes in CD8<sup>+</sup> T-cells with age.** Young and aged mice were immunized with 100  $\mu$ g pCI/C i.m. 13 days postvaccination, antigen specific CD8<sup>+</sup> T-cell frequencies were determined flow cytometrically in the spleen by *ex vivo* staining of CD8<sup>+</sup> T-cells with K<sup>b</sup>/C<sub>93-100</sub>-specific dimers. (A) General gating strategy to identify for antigen-specific K<sup>b</sup>/C<sub>93-100</sub><sup>+</sup> CD3<sup>+</sup>CD8<sup>+</sup> T-cells: CD3<sup>+</sup>CD8<sup>+</sup> T-cells were gated as mononucleated cells in the lymphocyte population. K<sup>b</sup>/C<sub>93-100</sub><sup>+</sup> cells were quantitatively determined within the CD3<sup>+</sup>CD8<sup>+</sup> T-cell population. Representative graphs of individual stains and quantification of antigen-specific CD3<sup>+</sup>CD8<sup>+</sup> T-cells are shown in (B) and (C), respectively (Y n = 7, O n = 7). \*\* p < 0.01, two-tailed unpaired student's t-test, mean + SEM.

**Figure S4**

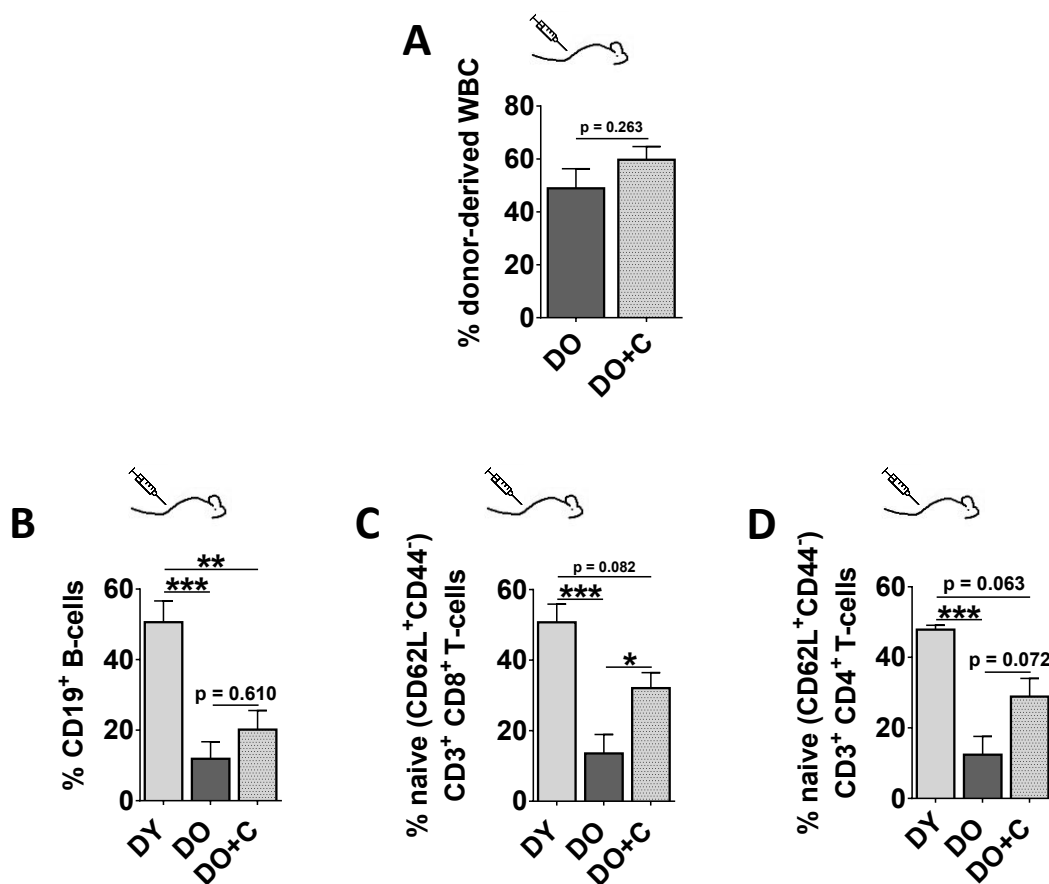

**Figure S4 WBC chimerism and frequency of naïve T- and B-cells in HSC-transplanted RAG1<sup>-/-</sup> recipients.** (A) Contribution of DO and DO+C HSCs to WBC was analyzed in spleen 12 weeks post-transplantation (DO *n* = 11, DO+C *n* = 9). To identify for B-cells as well as naïve CD4<sup>+</sup> and CD8<sup>+</sup> T-cells, splenocytes of recipients transplanted with DY, DO and DO+C HSCs were stained for CD3, CD4, CD8, CD62L, CD44 and CD19 expression. (B) B-cells were gated as CD19<sup>+</sup> mononucleated cells within the lymphocyte population. The proportion of CD19<sup>+</sup> B-cells is depicted. (C) Quantification of naïve (CD44<sup>-</sup>CD62L<sup>+</sup>) CD8<sup>+</sup> T-cells within the total CD3<sup>+</sup>CD8<sup>+</sup> T-cell population. (D) Frequency of naïve (CD44<sup>-</sup>CD62L<sup>+</sup>) CD4<sup>+</sup> T-cells within the CD3<sup>+</sup>CD4<sup>+</sup> T-cell population. (DY *n* = 4, DO *n* = 6 and DO+C *n* = 6). \* *p* < 0.05, \*\* *p* < 0.01, \*\*\* *p* < 0.001, ordinary one-way ANOVA, mean + SEM.

**Figure S5**

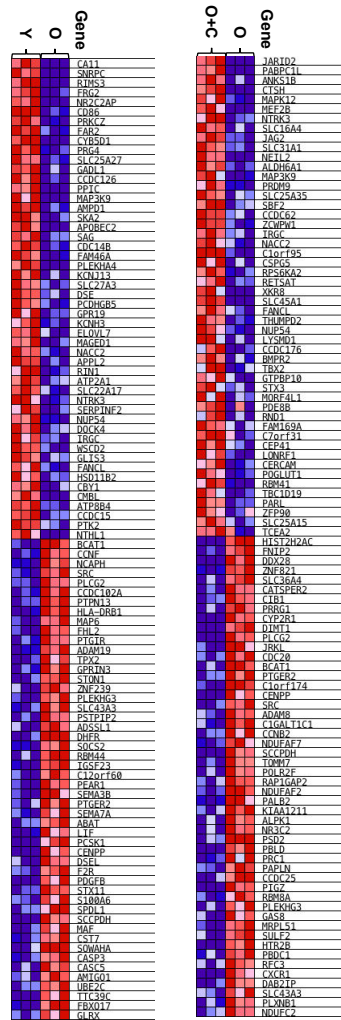

**Figure S5 GSEA on genes previously identified by Mirza *et al.* (2011).** Heat map of the GSEA depicting significantly enriched gene sets previously identified by Mirza *et al.* (2011) to be differentially expressed in naïve CD4<sup>+</sup> T-cells from non-transplanted young and aged mice compared to differentially expressed genes between DY vs. DO as well as DO+C vs. DO HSC recipients. DY, DO and DO+C *n* = 3.
